# Supplementary material for: Machine-Learning-Based Detecting of Eyelid Closure and Smiling Using Surface Electromyography of Auricular Muscles in Patients with Postparalytic Facial Synkinesis: A Feasibility Study
Source: MDPI journal article supplement (doi:10.3390/diagnostics13030554), 2023-02-02
Supplement: s1 [file s1]

**Supplement Table S1.** Features for the machine learning EMG classification.

| #  | Feature                     | Equation                                                                                                                                                                              | Reference              |
|----|-----------------------------|---------------------------------------------------------------------------------------------------------------------------------------------------------------------------------------|------------------------|
| 1  | Mean Absolute Value         | $\bar{x} = \frac{\sum_{i=0}^N x_i}{N}$                                                                                                                                                | Hudgins et al. [27]    |
| 2  | Variance                    | $var = \frac{\sum_{i=1}^N (x_i - \bar{x})^2}{N}$                                                                                                                                      | Phinyomark et al. [28] |
| 3  | Zero Crossings              | $zc = \sum_{i=1}^{N-1} [sgn(x_i \times x_{i+1})]$                                                                                                                                     | [29]                   |
| 4  | Root Mean Square            | $RMS = \sqrt{\frac{1}{N} \sum_{i=0}^N x_i^2}$                                                                                                                                         | Phinyomark et al. [28] |
| 5  | Wave Form Length            | $wl = \sum_{i=0}^{N-1}  x_{i+1} - x_i $                                                                                                                                               | Phinyomark et al. [28] |
| 6  | Cardinality                 | $c = card(\vec{x})$                                                                                                                                                                   | Ortiz-Catalan [30]     |
| 7  | Mean Teager–Kaiser Operator | $\vec{tk} = \begin{cases} x_i, & \text{if } i = 0 \text{ or } N \\ x_i^2 - (x_{i+1} \times x_{i-1}), & \text{otherwise} \end{cases}$<br>$\overline{tk} = \frac{\sum_{i=0}^N tk_i}{N}$ | Li and Aruin [31]      |
| 8  | Entropy                     | $H_{Sh} = - \sum_{i=1}^{16} p_i(\vec{x}) \log p_i(\vec{x})$                                                                                                                           | Shannon [32]           |
| 9  | Modified Mean Frequency     | $mmnf = \frac{\sum_{j=1}^M f_j A_j}{\sum_{j=1}^M A_j}$                                                                                                                                | Phinyomark et al. [28] |
| 10 | Mean Frequency              | $mnf = \frac{\sum_{j=1}^M f_j P_j}{\sum_{j=1}^M P_j}$                                                                                                                                 | Phinyomark et al. [28] |
| 11 | Feature Normalization       | $F_{i,norm} = \frac{F_i - \bar{F}}{std(\vec{F})}$                                                                                                                                     | Géron et al. [25]      |

List of the calculated features:  $\vec{x}$ ... EMG vector of one window,  $x_i$ ... i-th sample from  $\vec{x}$ ,  $N$ ... number of samples in  $\vec{x}$ ,  $p_i(\vec{x})$ ... magnitude of the i-th bin when  $\vec{x}$  is transformed into a 16-bin histogram based on the amplitude,  $f_j$ ... j-th frequency in the spectrum,  $M$ ... number of discrete frequencies in the spectrum,  $A_j$ ...amplitude of the frequency spectrum at  $f_j$ ,  $P_j$ ... amplitude of the power spectrum at  $f_j$ ,  $\vec{F}$ ... feature vector,  $F_i$ ... i-th sample of  $\vec{F}$ ,  $F_{i,norm}$ ... normalized sample of  $\vec{F}$ , and  $std(\vec{F})$ ... standard deviation of  $\vec{F}$ .
